# Supplementary material for: The bivalve Glycymeris planicostalis as a high-resolution paleoclimate archive for the Rupelian (Early Oligocene) of central Europe
Source: Copernicus journal article supplement (doi:10.5194/cp-11-653-2015), 2015-04-10
Supplement: Supplementary file 1 [file cp-11-653-2015-supplement.zip]

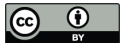

*Supplement of*

**The bivalve *Glycymeris planicostalis* as a high-resolution paleoclimate archive for the Rupelian (Early Oligocene) of central Europe**

**E. O. Walliser et al.**

*Correspondence to:* E. O. Walliser ([walliser@uni-mainz.de](mailto:walliser@uni-mainz.de))

- [cp-11-653-2015-supplement-cover-letter.pdf](#)
- [cp-2014-126\\_Supplements\\_submission.doc](#)
